# Supplementary material for: SOCS6 promotes radiosensitivity and decreases cancer cell stemness in esophageal squamous cell carcinoma by regulating c-Kit ubiquitylation
Source: PubMed Central journal article supplement (PMC7953756; doi:10.1186/s12935-021-01859-2), 2021-03-12

**a**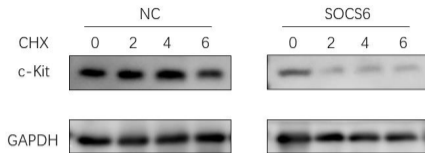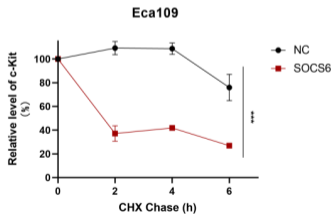**b**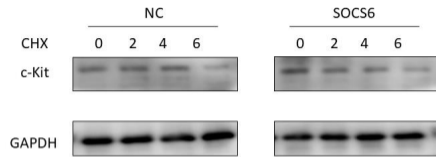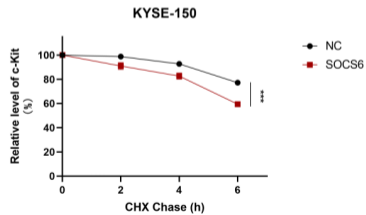

Supplement: 12935_2021_1859_MOESM4_ESM.pdf [file 12935_2021_1859_MOESM4_ESM.pdf]
